# Supplementary material for: Menstrual Cycle Variations in Gray Matter Volume, White Matter Volume and Functional Connectivity: Critical Impact on Parietal Lobe
Source: Frontiers journal article supplement (doi:10.3389/fnins.2020.594588), 2020-12-22
Supplement: Image_1.pdf [file Image_1.pdf]

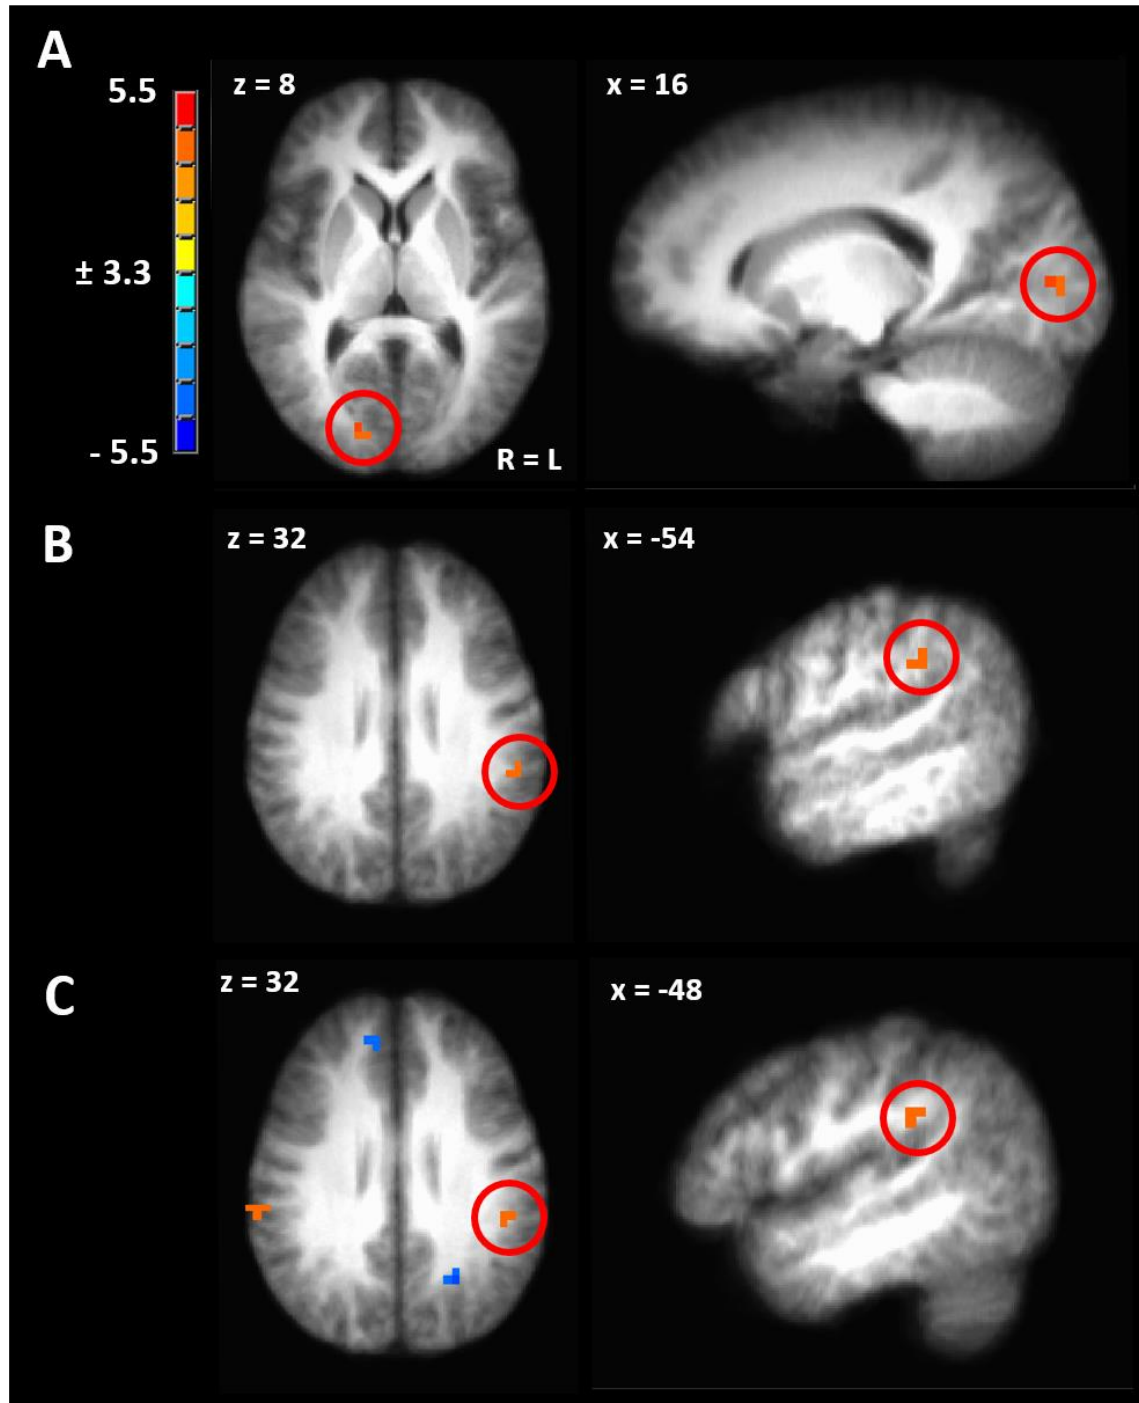

**Supplemental Figure 1.** A) Significant cluster from functional connectivity driven from left inferior parietal lobule from the contrast of ovulatory phase > menstrual phase. B) Significant cluster from functional connectivity driven from right inferior parietal lobule from the contrast of ovulatory phase > menstrual phase. C) Significant cluster from functional connectivity driven from right inferior parietal lobule from the contrast of ovulatory phase > luteal phase. While these maps were thresholded at  $p < 0.001$ , no clusters passed cluster-extent correction for multiple comparisons.
